# Supplementary material
Source: publisher figshare collection journal article supplement (https://karger.figshare.com/articles/dataset/_/8319965)

# S1

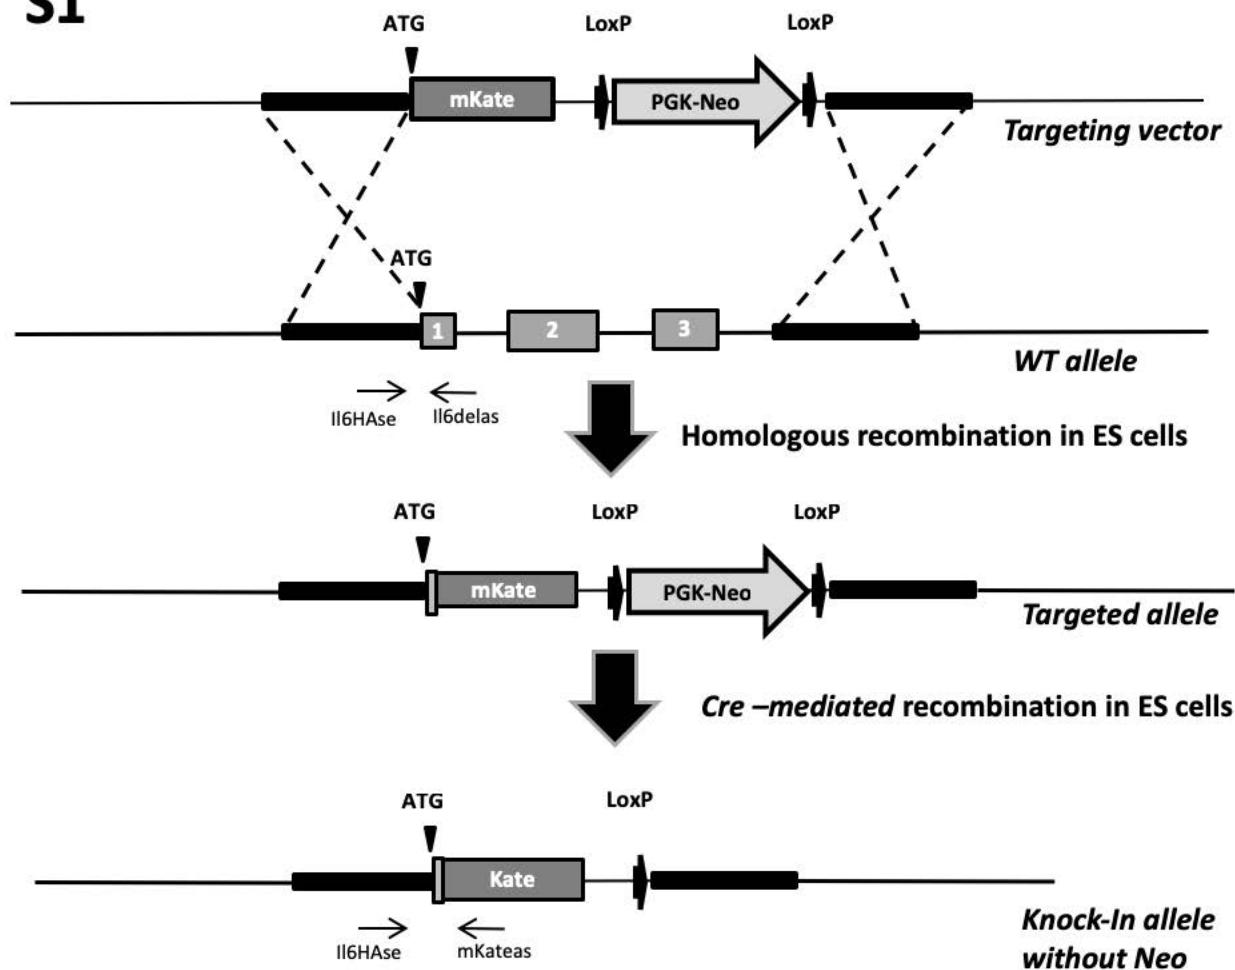

# S2

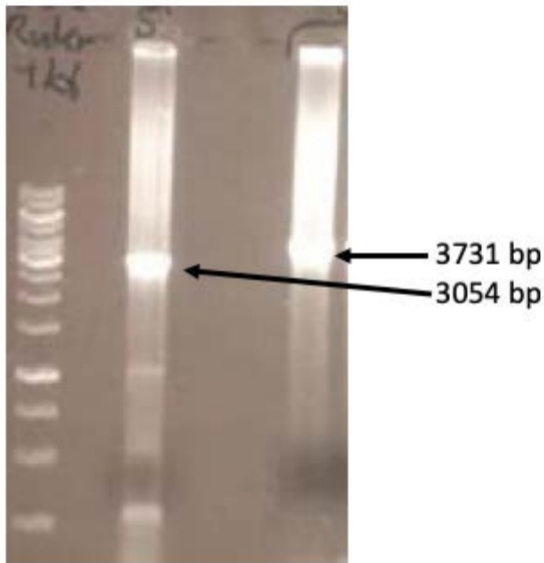

**S3A**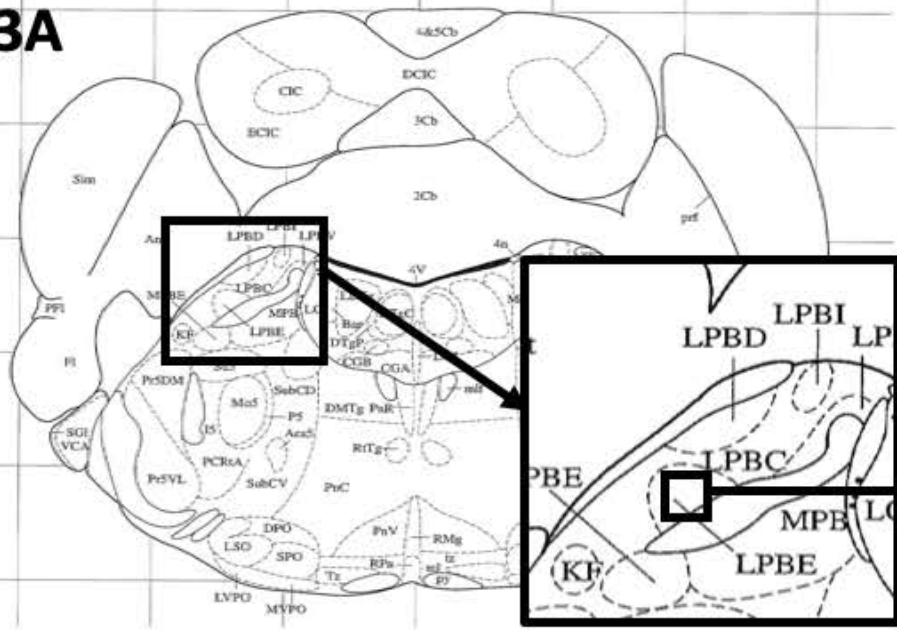**S3B**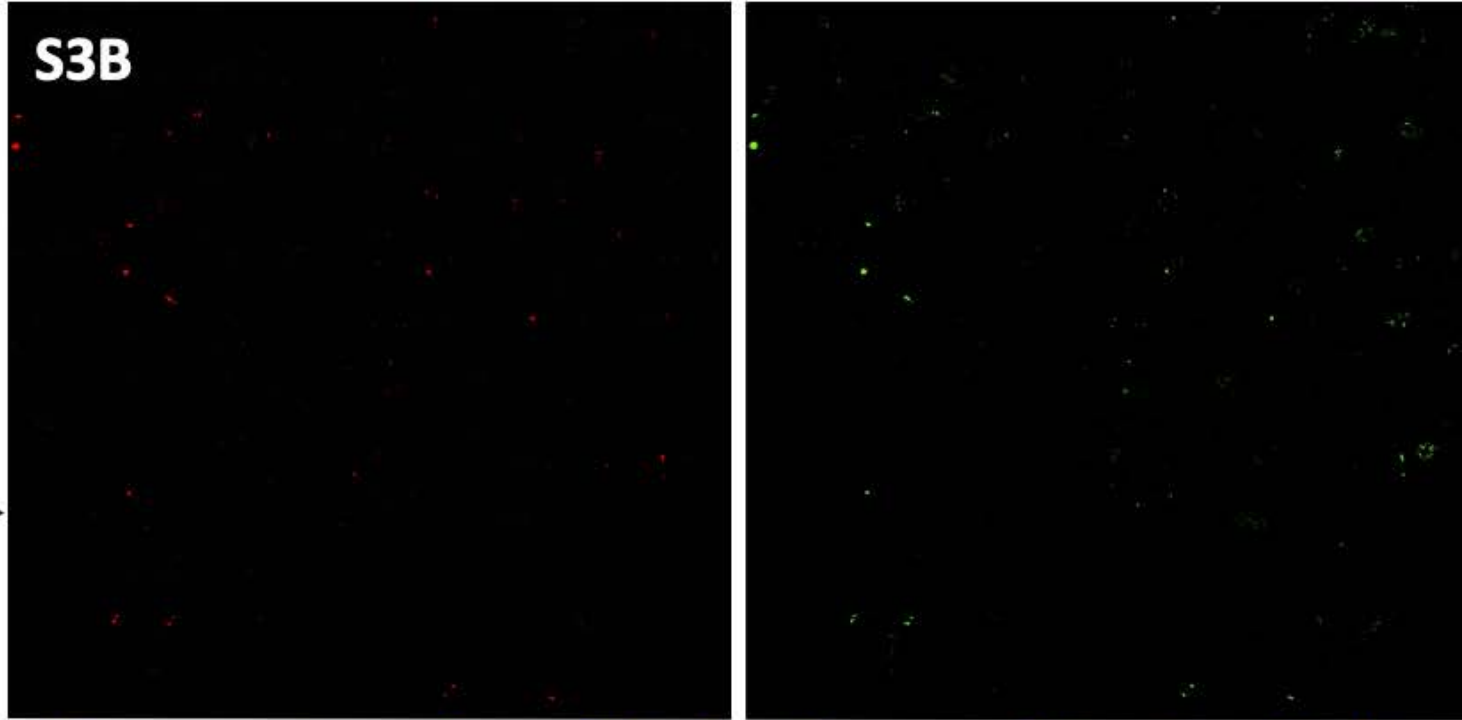**S3C**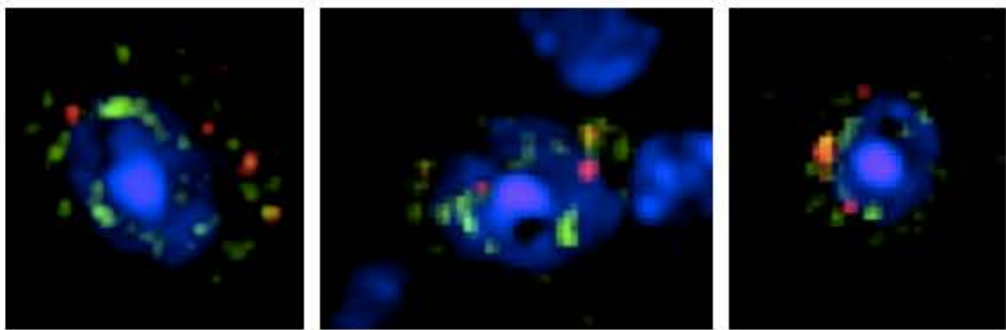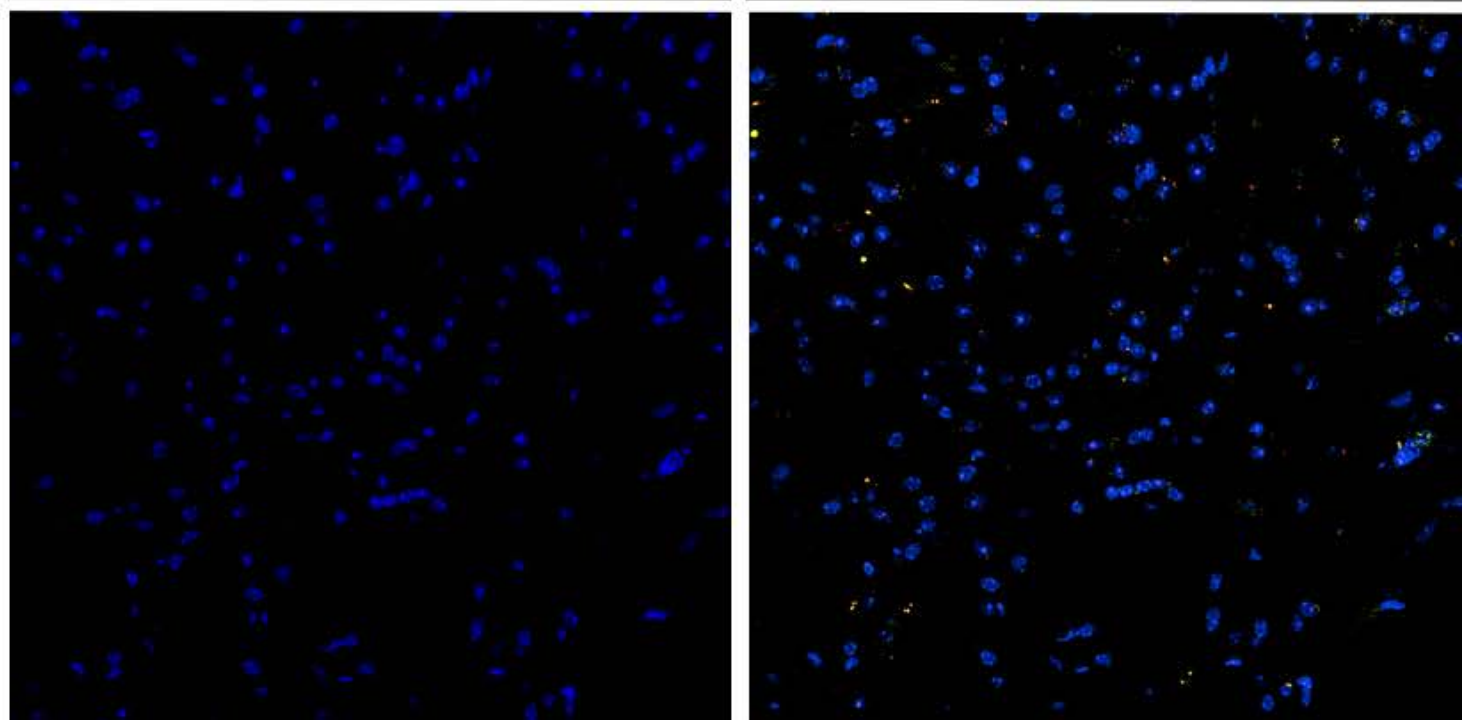

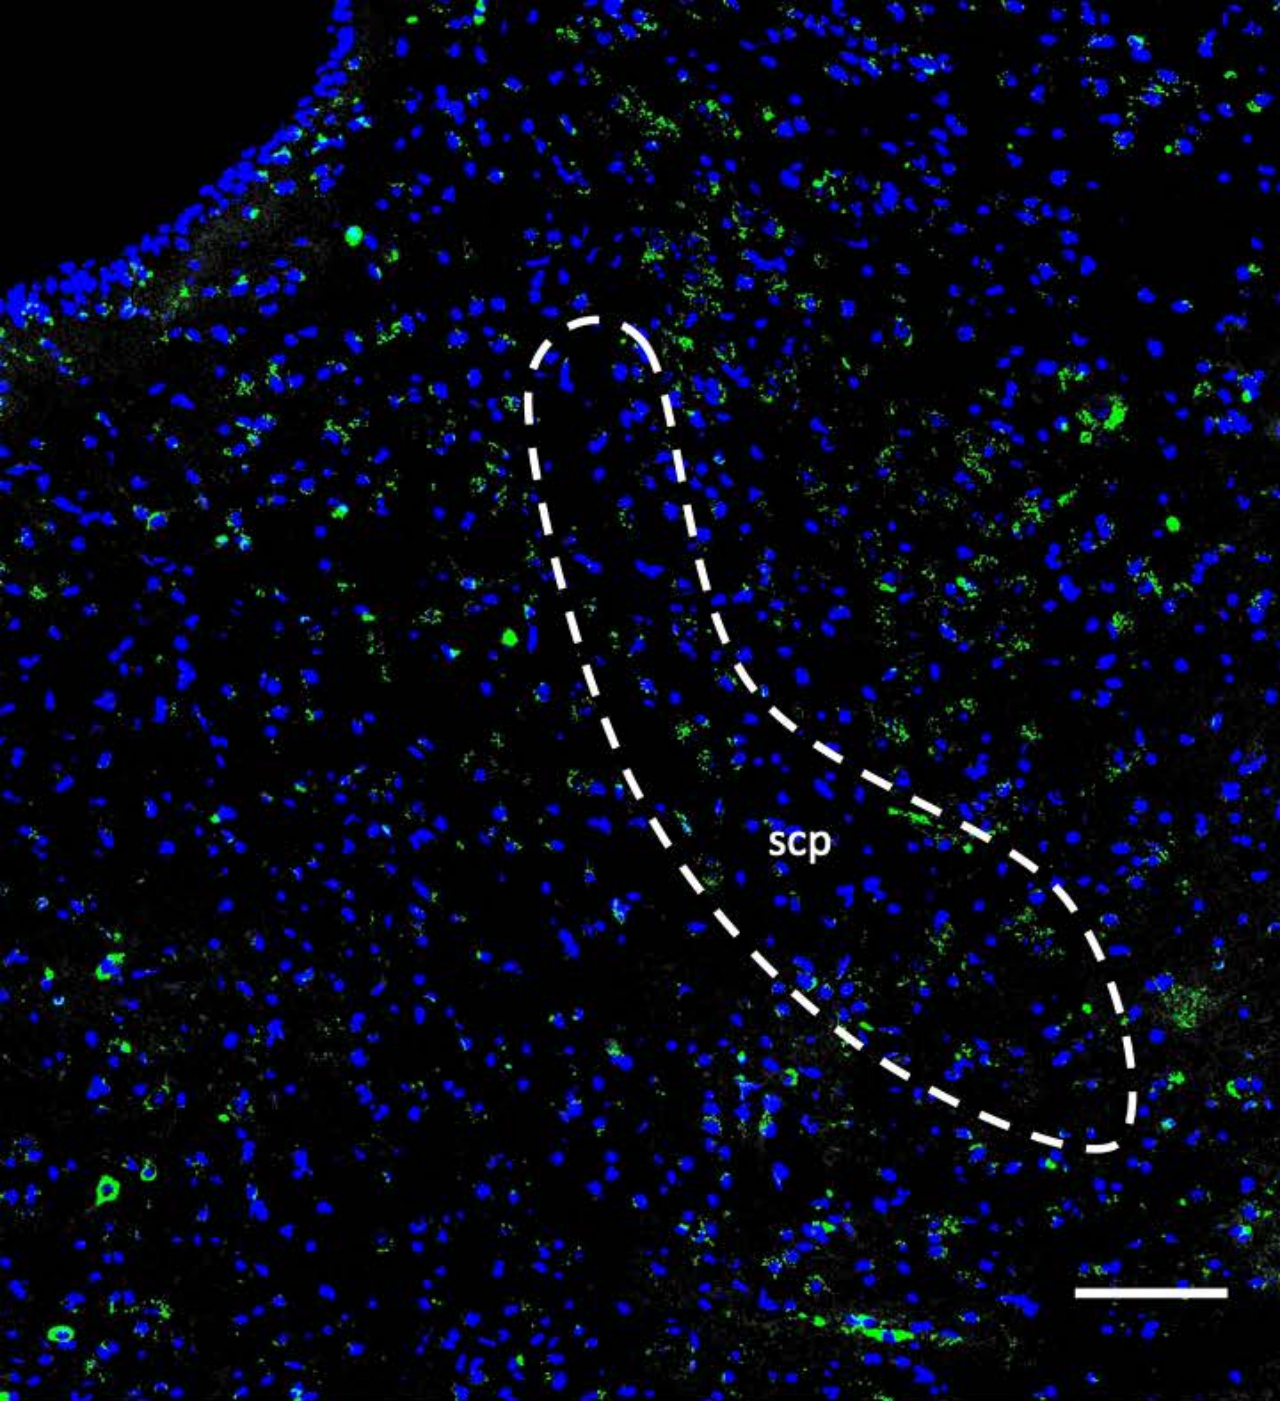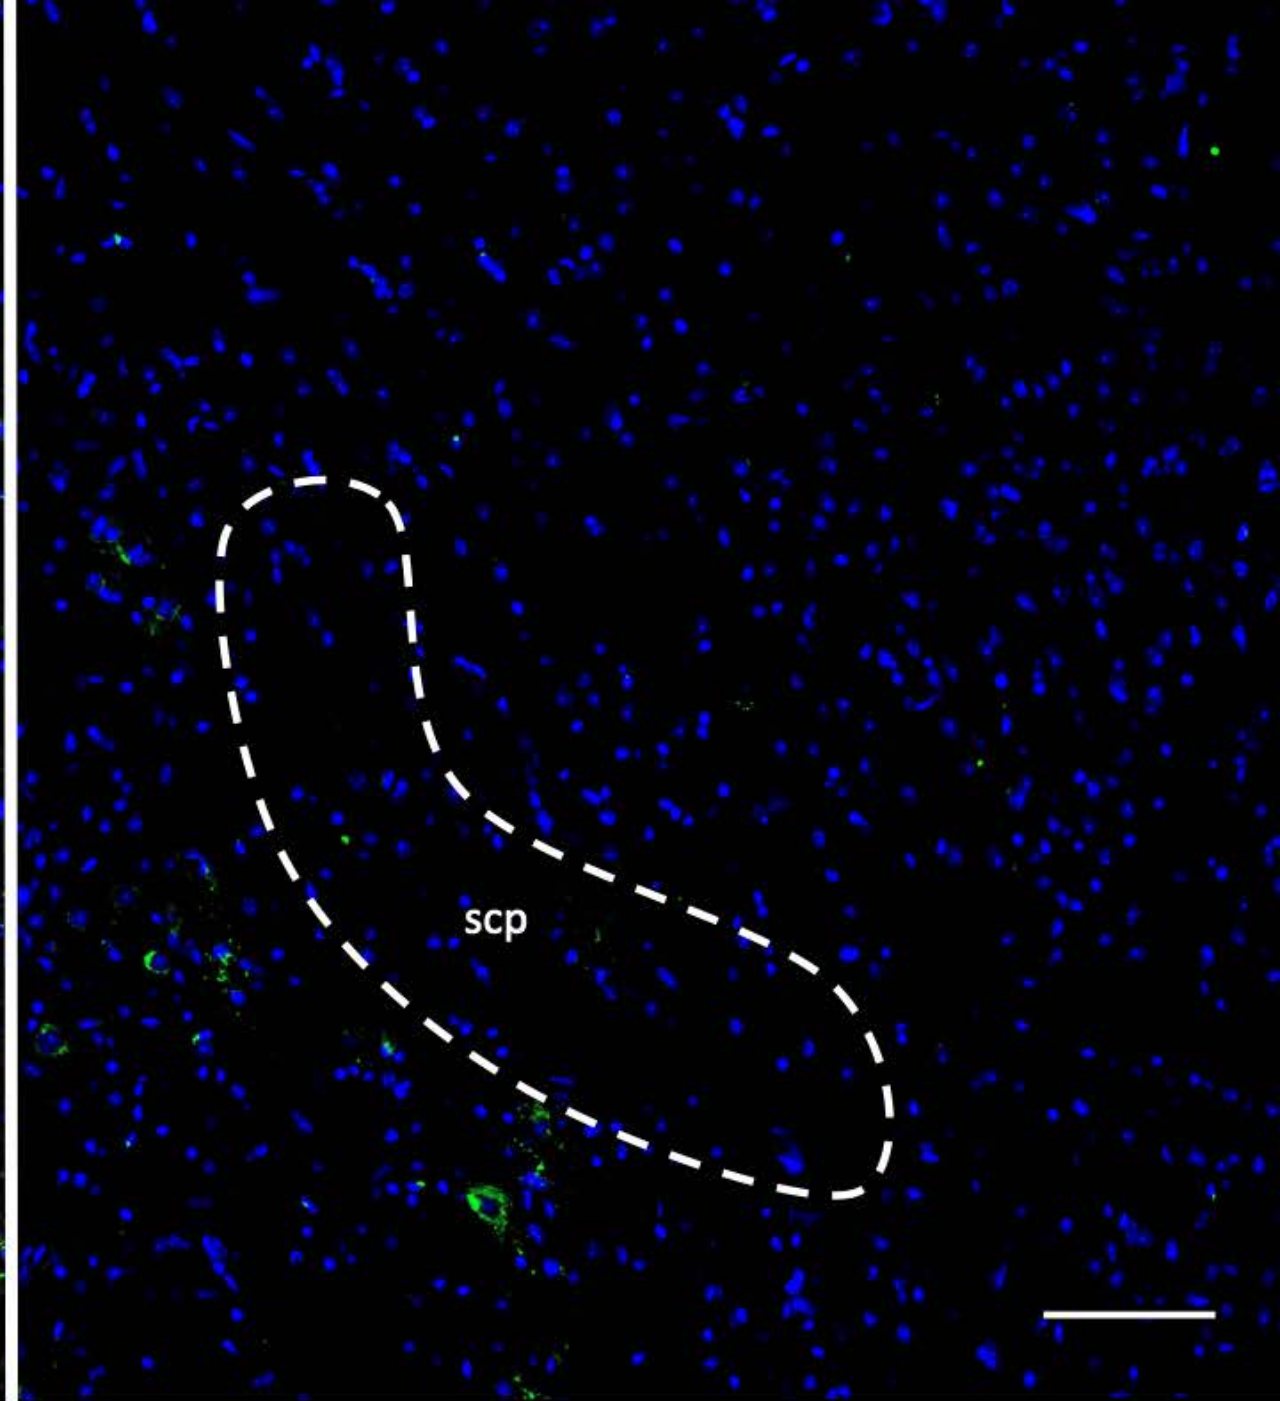

S5A

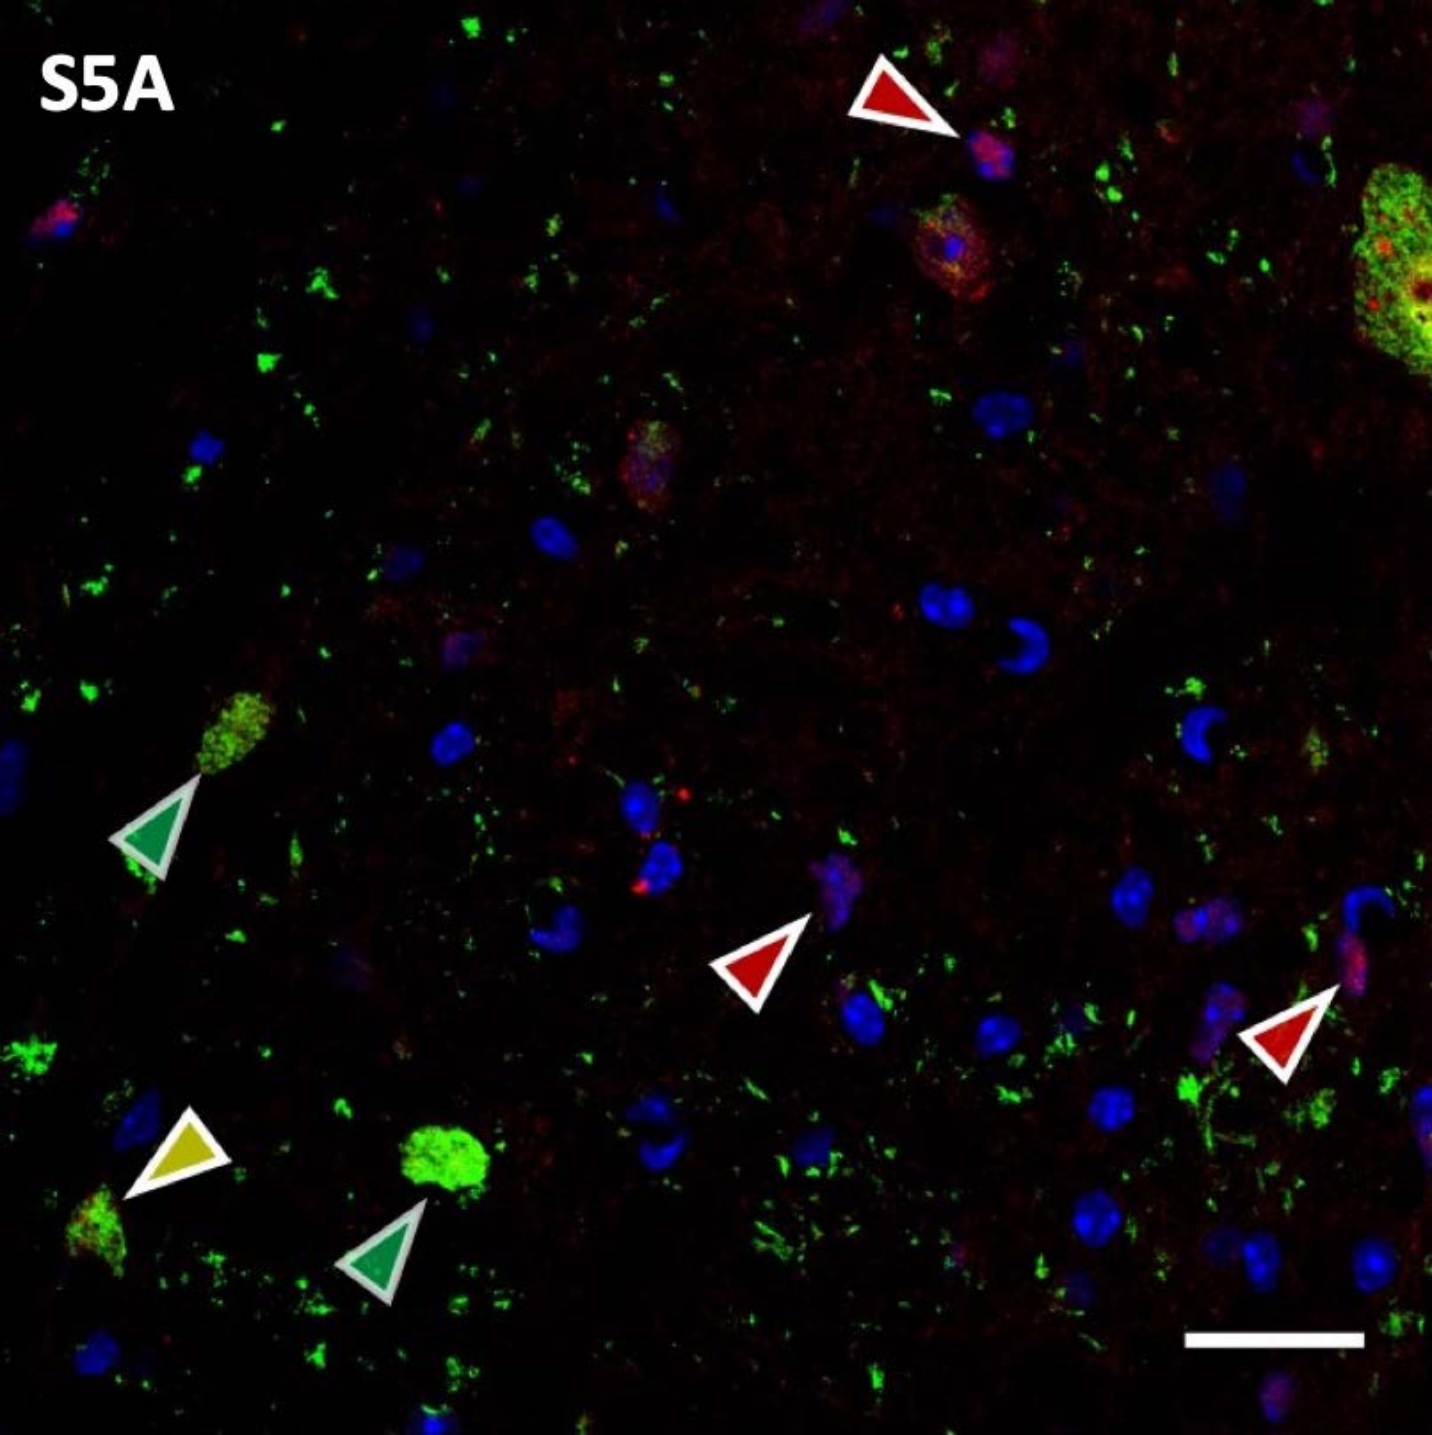

# S5B

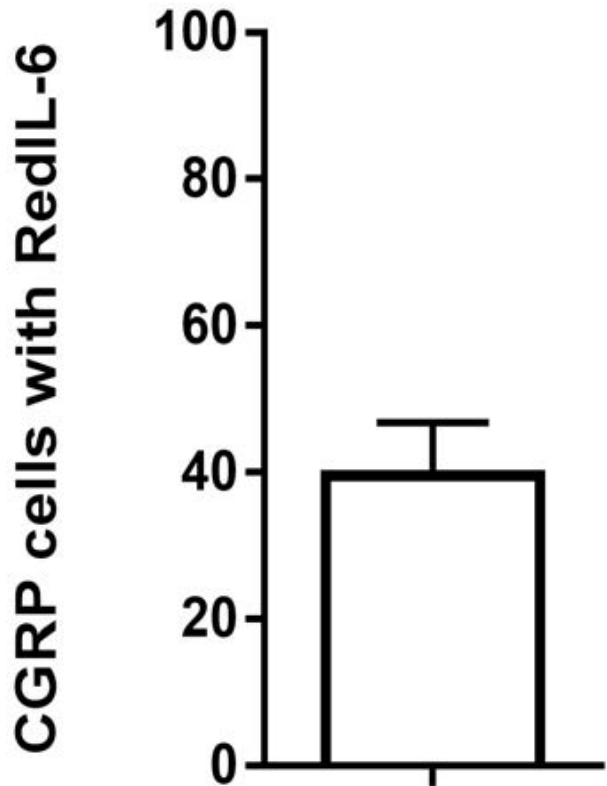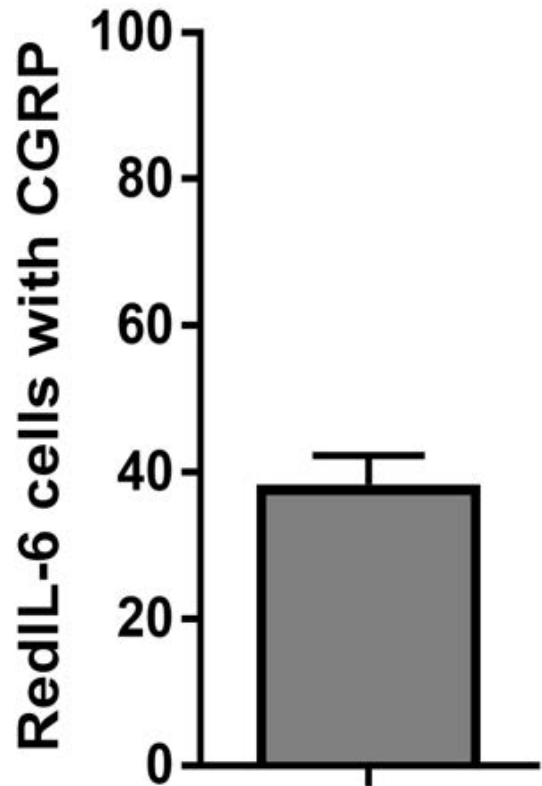

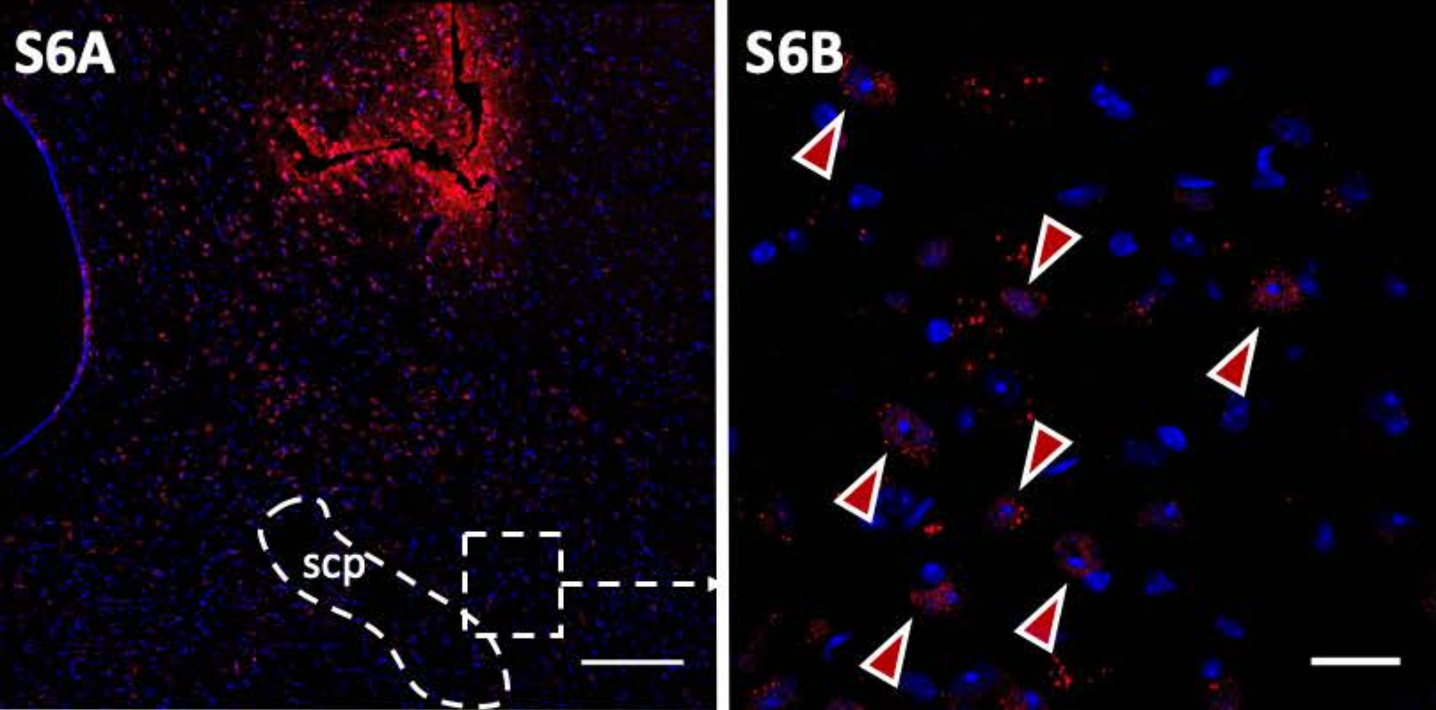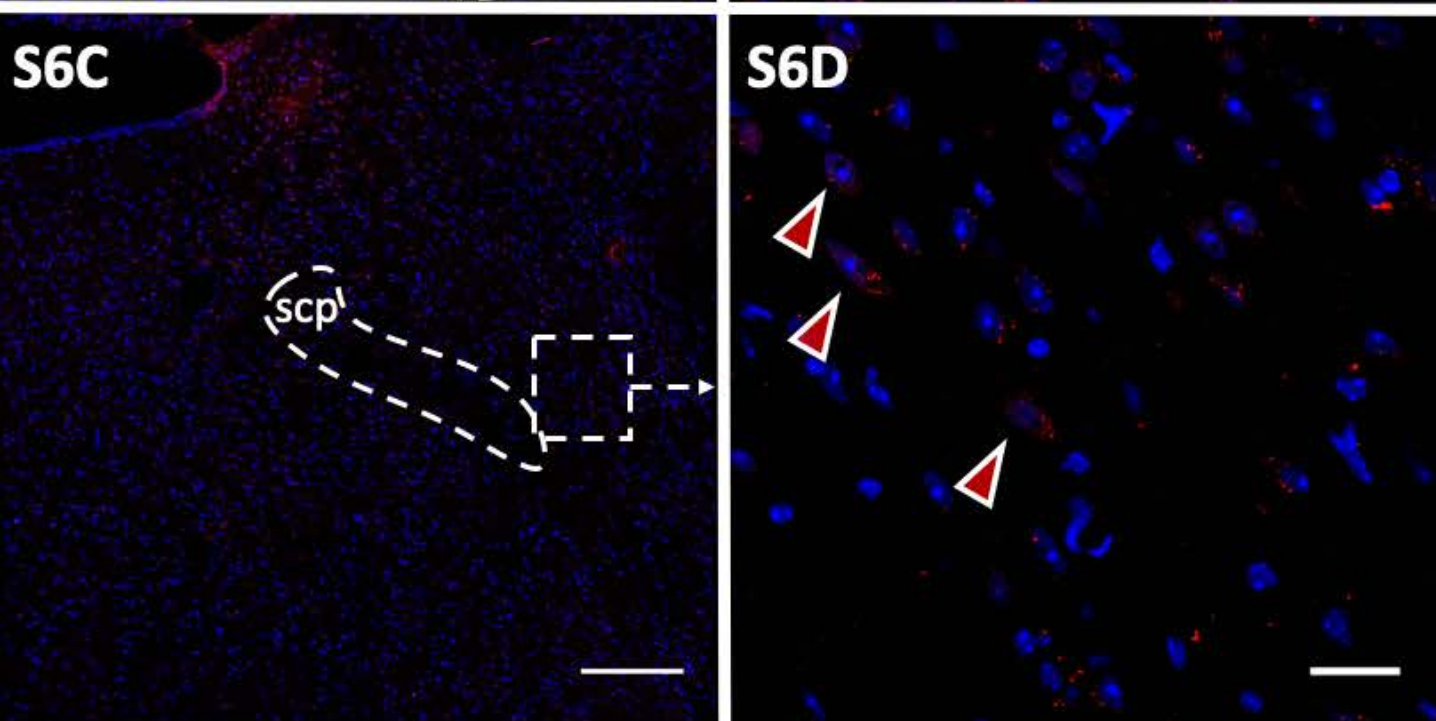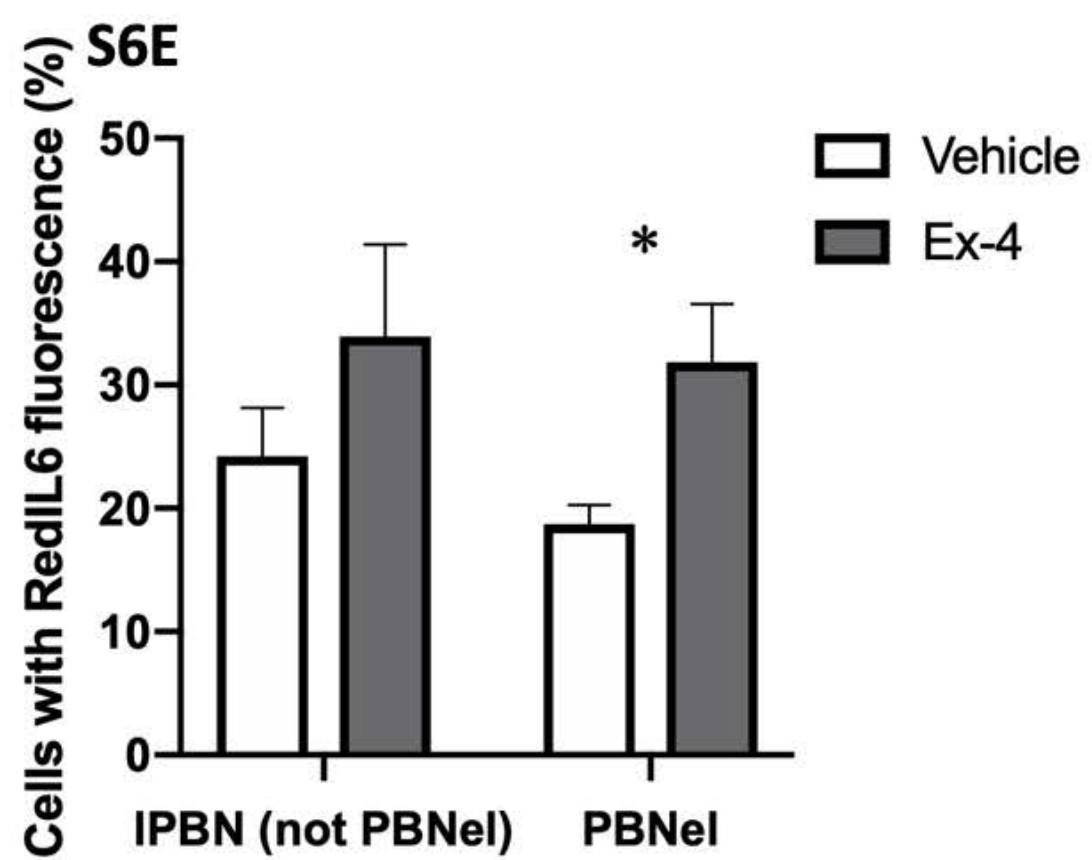

Supplement: Supplementary file 1 [file 1]
